# Supplementary material for: A randomized matched-pairs study of feasibility, acceptability, and effectiveness of systems consultation: a novel implementation strategy for adopting clinical guidelines for Opioid prescribing in primary care
Source: Springer Nature journal article supplement (doi:10.1186/s13012-018-0713-1), 2018-01-25
Supplement: MOESM1 [file 15416860]

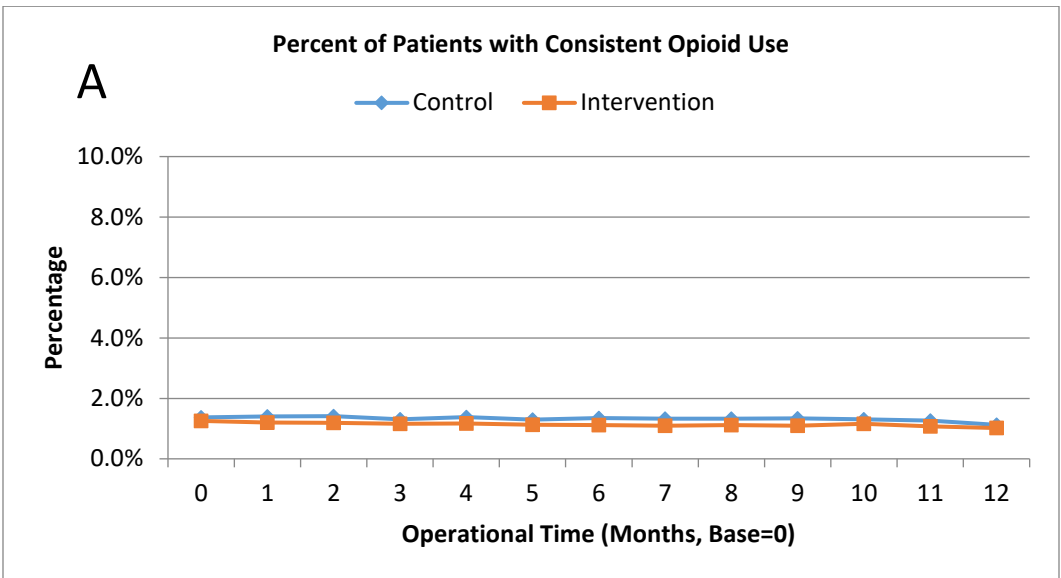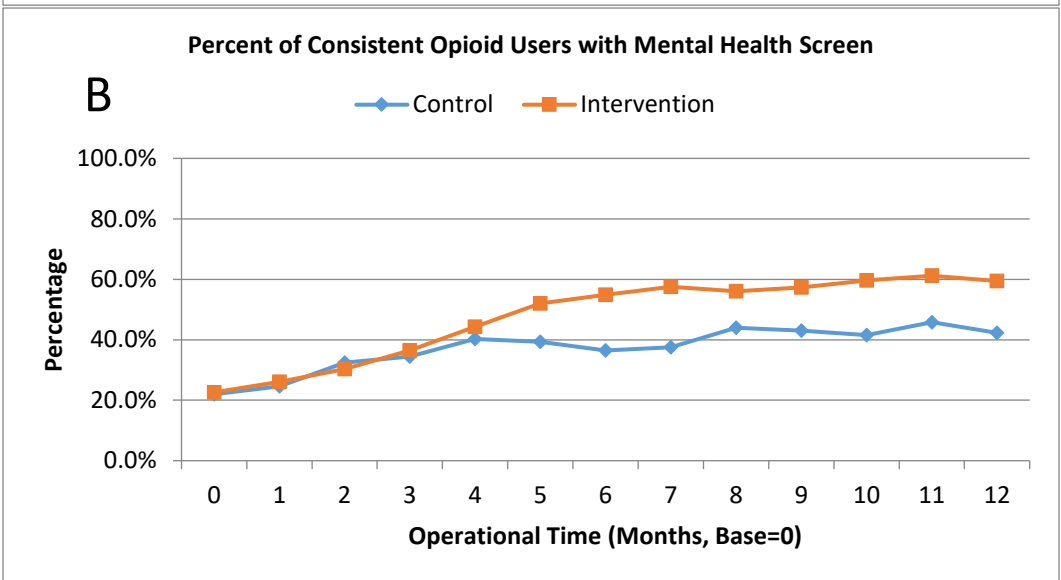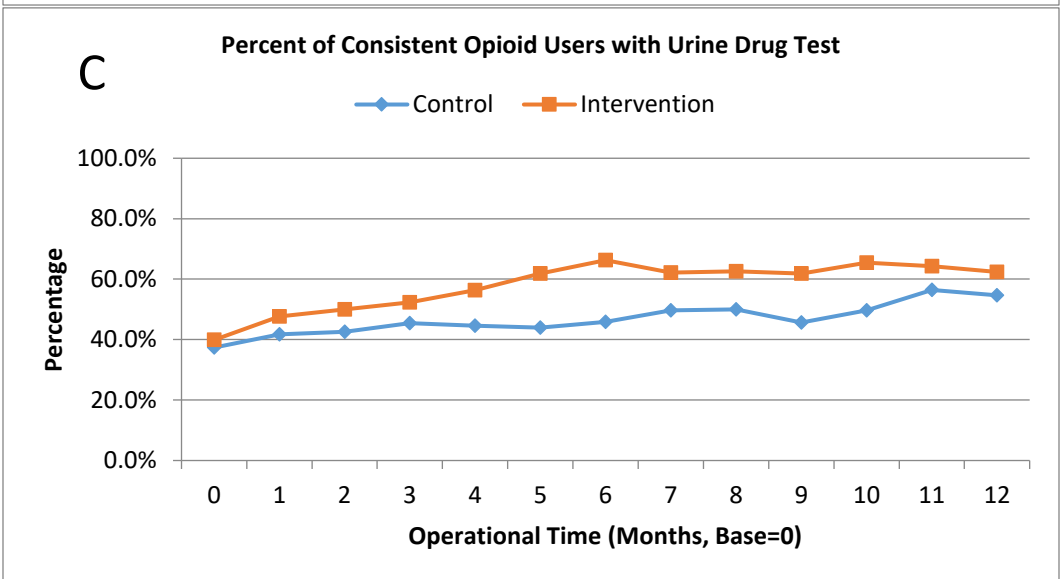

D

Percent of Consistent Opioid Users with Treatment Agreement

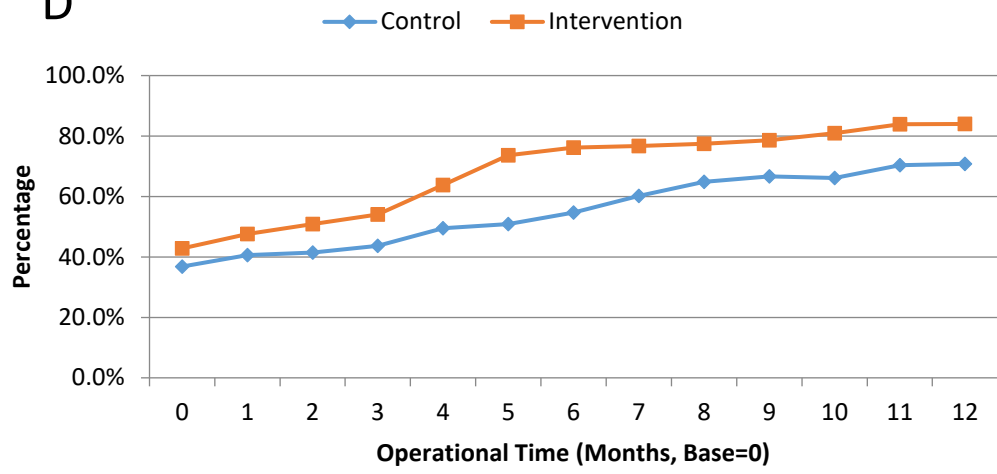

E

Average MEDD of Consistent Opioid Users

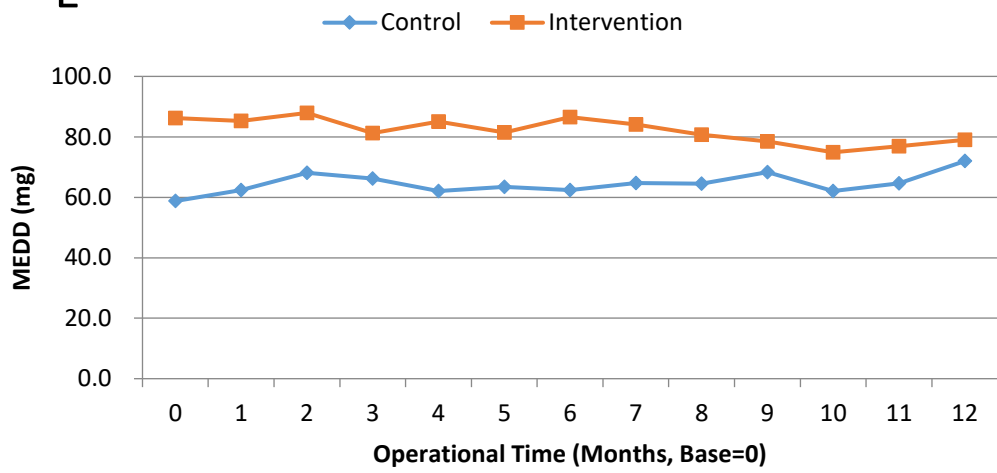

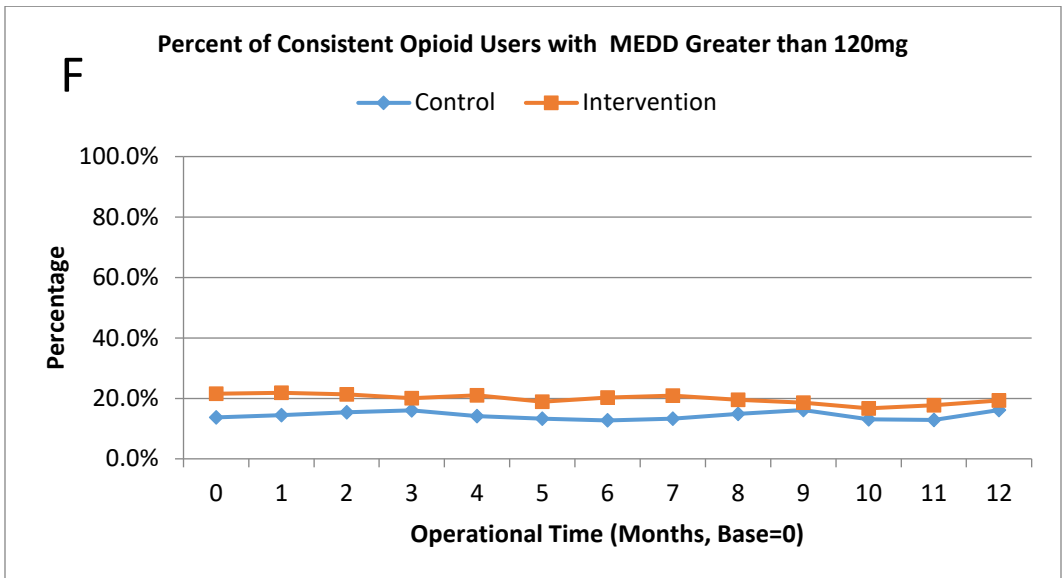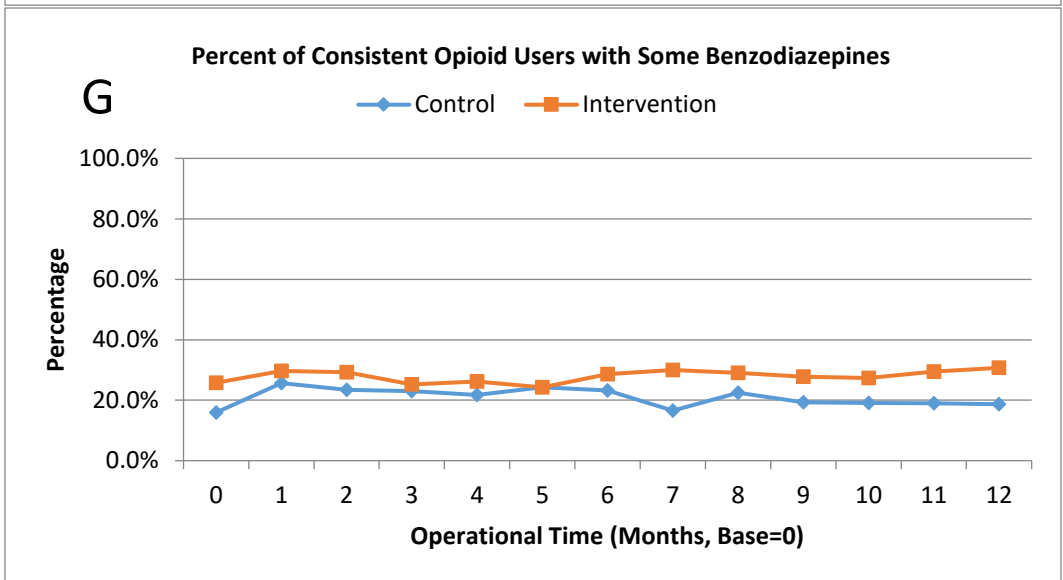

Figures A-G. Time series quality indicator outcomes
